# Supplementary material
Source: Copernicus journal article supplement (doi:10.5194/nhess-26-2133-2026)
Supplement: Supplementary file 1 [file nhess-26-2133-2026-supplement.pdf]

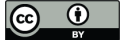

*Supplement of*

## **Combining hazard, exposure and vulnerability data to predict historical United States hurricane losses**

**Alexander F. Vessey et al.**

*Correspondence to:* Alexander F. Vessey ([alexander.vessey@axaxl.com](mailto:alexander.vessey@axaxl.com))  
and Alexander J. Baker ([alexander.baker@reading.ac.uk](mailto:alexander.baker@reading.ac.uk))

The copyright of individual parts of the supplement might differ from the article licence.

| Risk Variable            | Acronym                                                              | Description                                                                                                                                                                                                               | Reference                                |
|--------------------------|----------------------------------------------------------------------|---------------------------------------------------------------------------------------------------------------------------------------------------------------------------------------------------------------------------|------------------------------------------|
| Historical Loss          | NOAA Billion Dollar Loss Record                                      | Historical hurricane loss estimates collected by NOAA                                                                                                                                                                     | NOAA (2025)                              |
|                          | EMDAT Loss History                                                   | Historical hurricane loss estimates collected by EMDAT                                                                                                                                                                    | Delforge et al. (2025)                   |
|                          | Muller et al. (2025)                                                 | Historical hurricane loss estimates collected by Muller et al.                                                                                                                                                            | Muller et al. (2025)                     |
|                          | Grinsted et al. (2025)                                               | Historical hurricane loss estimates collected by Grinsted et al.                                                                                                                                                          | Grinsted et al. (2025)                   |
|                          | Weinkle et al. (2025)                                                | Historical hurricane loss estimates collected by Weinkle et al.                                                                                                                                                           | Weinkle et al. (2025)                    |
| Hazard                   | IBTrACS                                                              | International Best Track Archive for Climate Stewardship (IBTrACS) project global tropical cyclones data collection                                                                                                       | Gahtan et al. (2025)                     |
|                          | HURDAT                                                               | NOAA Hurricane Research Division detailed List of Continental United States Hurricane Impacts/Landfalls                                                                                                                   | Hurricane Research Division. (2025)      |
|                          | NOAA Rainfall                                                        | Tropical cyclone rainfall footprint figures, indicating maximum rainfall accumulation                                                                                                                                     | NOAA (2025b)                             |
|                          | MSWEP Rainfall                                                       | Sub-daily precipitation dataset with full global coverage at 0.1° resolution                                                                                                                                              | Beck et al. (2019)                       |
|                          | ERA5 Storm Surge                                                     | Global gridded time series of global sea level related variables including tides, storm surges and sea level rise from 1950 to 2050 based on hydrodynamic modelling                                                       | Copernicus Climate Change Service (2022) |
|                          | Gori et al. (2023) ( <i>Size &amp; Storm Surge Reconstructions</i> ) | Reconstructed TC sizes for North Atlantic storms from 1950-present using reanalysis data and a physics-based TC wind model                                                                                                | Gori et al. (2023)                       |
| Exposure                 | GHSL: Building Density                                               | Global gridded dataset of the distribution of built-up surface area                                                                                                                                                       | Pesaresi and Politis (2023)              |
|                          | WorldPOP (Population Density)                                        | Global gridded dataset of the distribution of population                                                                                                                                                                  | WorldPOP (2018)                          |
|                          | ACS: Housing Unit Density                                            | 2019-2023 data from the American Community Survey (ACS) about housing units by year built by tenure                                                                                                                       | U.S. Census Bureau (2024)                |
|                          | LitPOP: Exposure Value                                               | Global gridded dataset developed by ETH Zurich to estimate the economic value of assets                                                                                                                                   | Eberenz et al. (2020)                    |
|                          | FEMA: Exposure Value                                                 | FEMA National Risk Index is an online mapping tool that identifies U.S. communities most at risk from natural hazards, including data on exposure value per USA county                                                    | FEMA (2024)                              |
| Vulnerability            | GDP                                                                  | USA State Gross Domestic Product                                                                                                                                                                                          | U.S. Bureau of Economic Analysis (2025)  |
|                          | ACS: Mean Building Year                                              | 2019-2023 data from the American Community Survey (ACS) about housing units by year built by tenure                                                                                                                       | U.S. Census Bureau (2024)                |
|                          | FEMA: Historical Loss Ratio (HLR)                                    | FEMA National Risk Index is an online mapping tool that identifies U.S. communities most at risk from natural hazards, including data on historical loss ratios per USA county                                            | FEMA (2024)                              |
|                          | FEMA: Risk Value                                                     | FEMA National Risk Index is an online mapping tool that identifies U.S. communities most at risk from natural hazards, including data on risk score based on social vulnerability and community resilience per USA county | FEMA (2024)                              |
|                          | FEMA: Building Resilience                                            | FEMA's Building Code Adoption Tracking (BCAT) System                                                                                                                                                                      | FEMA (2025)                              |
|                          | Mean Damageability: Emanuel (2021) Vulnerability                     | Wind-damage function equation that produces positive values only for winds speeds more than a specified threshold                                                                                                         | Emanuel (2021)                           |
| Exposure & Vulnerability | LitPOP Damaged                                                       | LitPOP gridded exposure value multiplied by % damage coefficients derived from Emanuel (2021), given hurricane characteristics                                                                                            | NA                                       |
|                          | GHSL Damaged                                                         | GHSL gridded building density value multiplied by % damage coefficients derived from Emanuel (2021), given hurricane characteristics                                                                                      | NA                                       |

**Table S1.** Descriptions and references for all hurricane loss, hazard, exposure and vulnerability datasets used in this study.

Hurricane Katrina (2005)  
Max. Storm Surge Residual +/- 24 hours  
within 500km of Storm Centre (29/08/2005 12UTC)

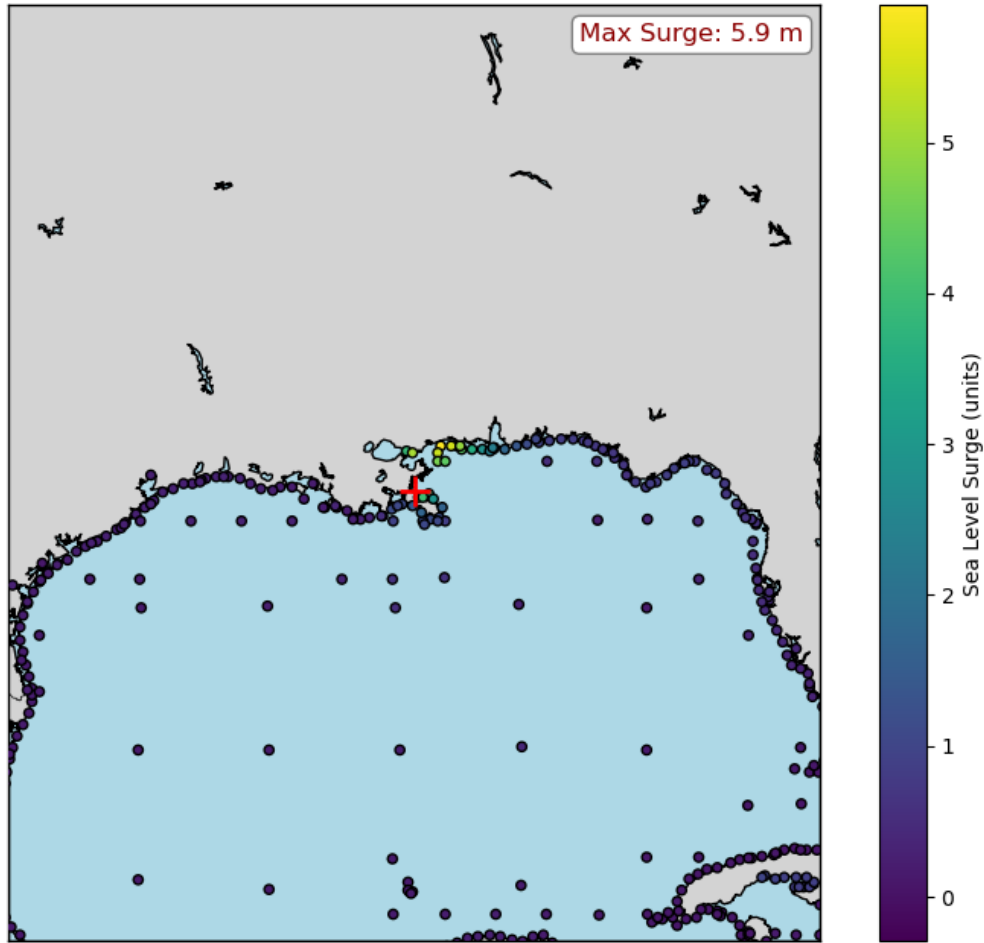

**Figure S1.** Example ERA5-derived storm surge residual reconstruction for Hurricane Katrina (2005), which made landfall on the 28<sup>th</sup> August 2005, defined as maxima within 500km of the cyclone centre and  $\pm 24$  hours of landfall. Unit is metres above reference height.

AL122005 (2005\_KATRINA) (MSWEP)

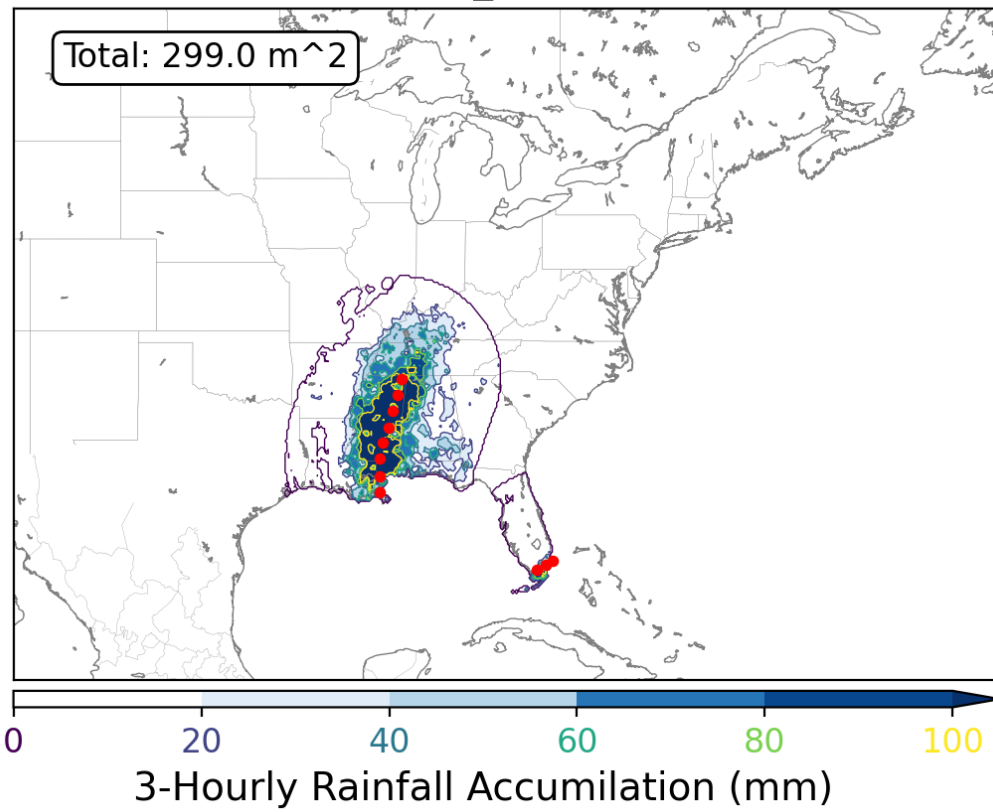

**Figure S2.** Example rainfall footprint for Hurricane Katrina (2005), determined by accumulating three-hourly MSWEP data along the track following landfall.

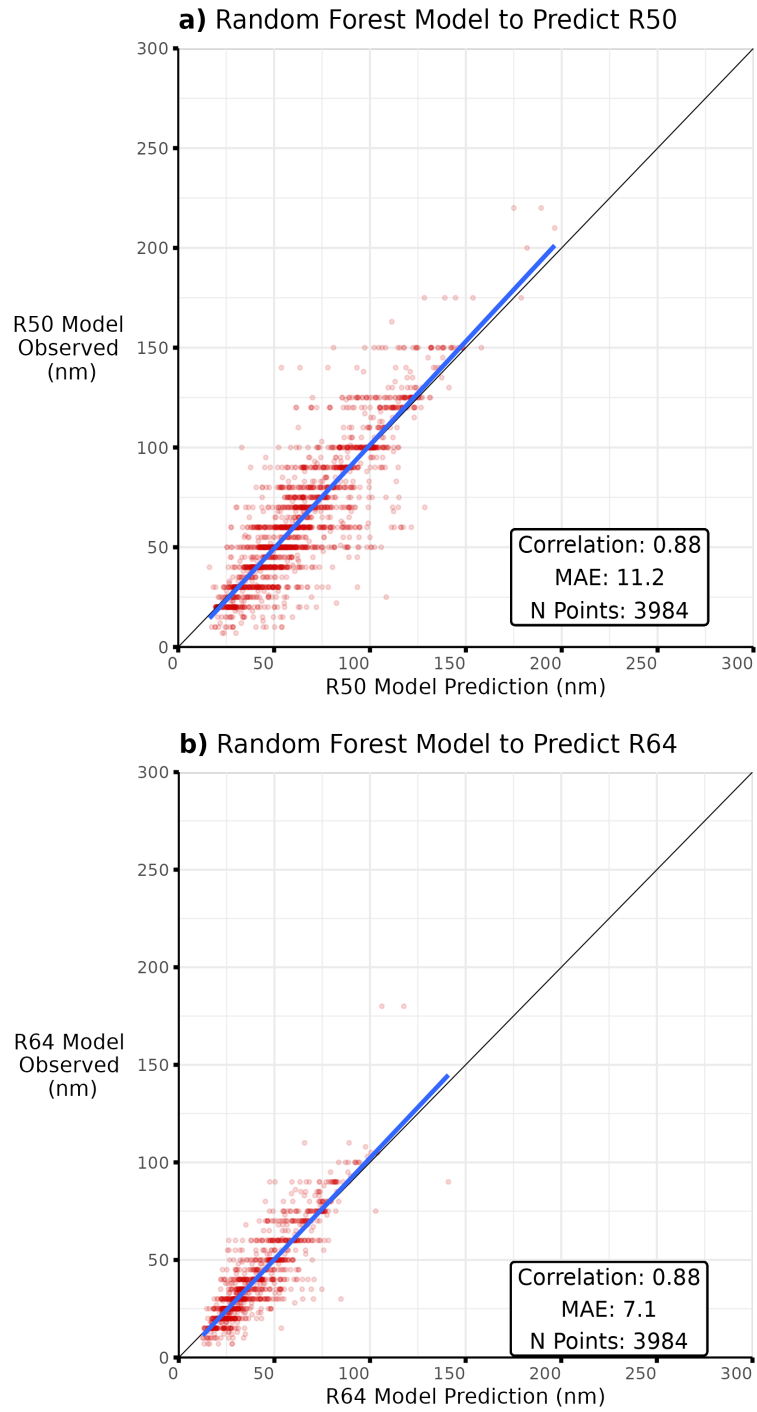

**Figure S3.** Comparison of estimated and observed hurricane **a) R50** and **b) R64** from 1979–2023, using a random forest statistical model based on  $v_{\max}$ , RMW,  $c_p$  and latitude as predictors.

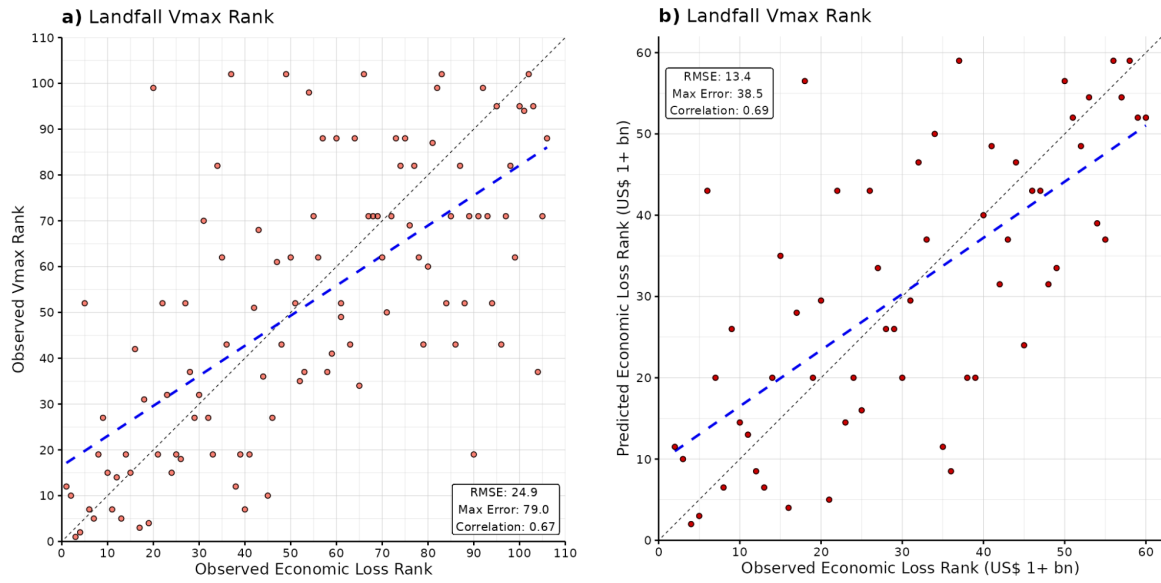

**Figure S4.** Leave-one-out evaluation using a generalised linear-prediction model to predict historical hurricane loss rank using landfall  $v_{max}$  for a) all hurricanes for which all landfall variables could be derived ( $n = 106$ ) and b) hurricanes that caused  $\geq \$1$  bn normalised economic damage ( $n = 60$ ). Rank 1 denotes the most intense hurricane at landfall and the highest normalised loss.

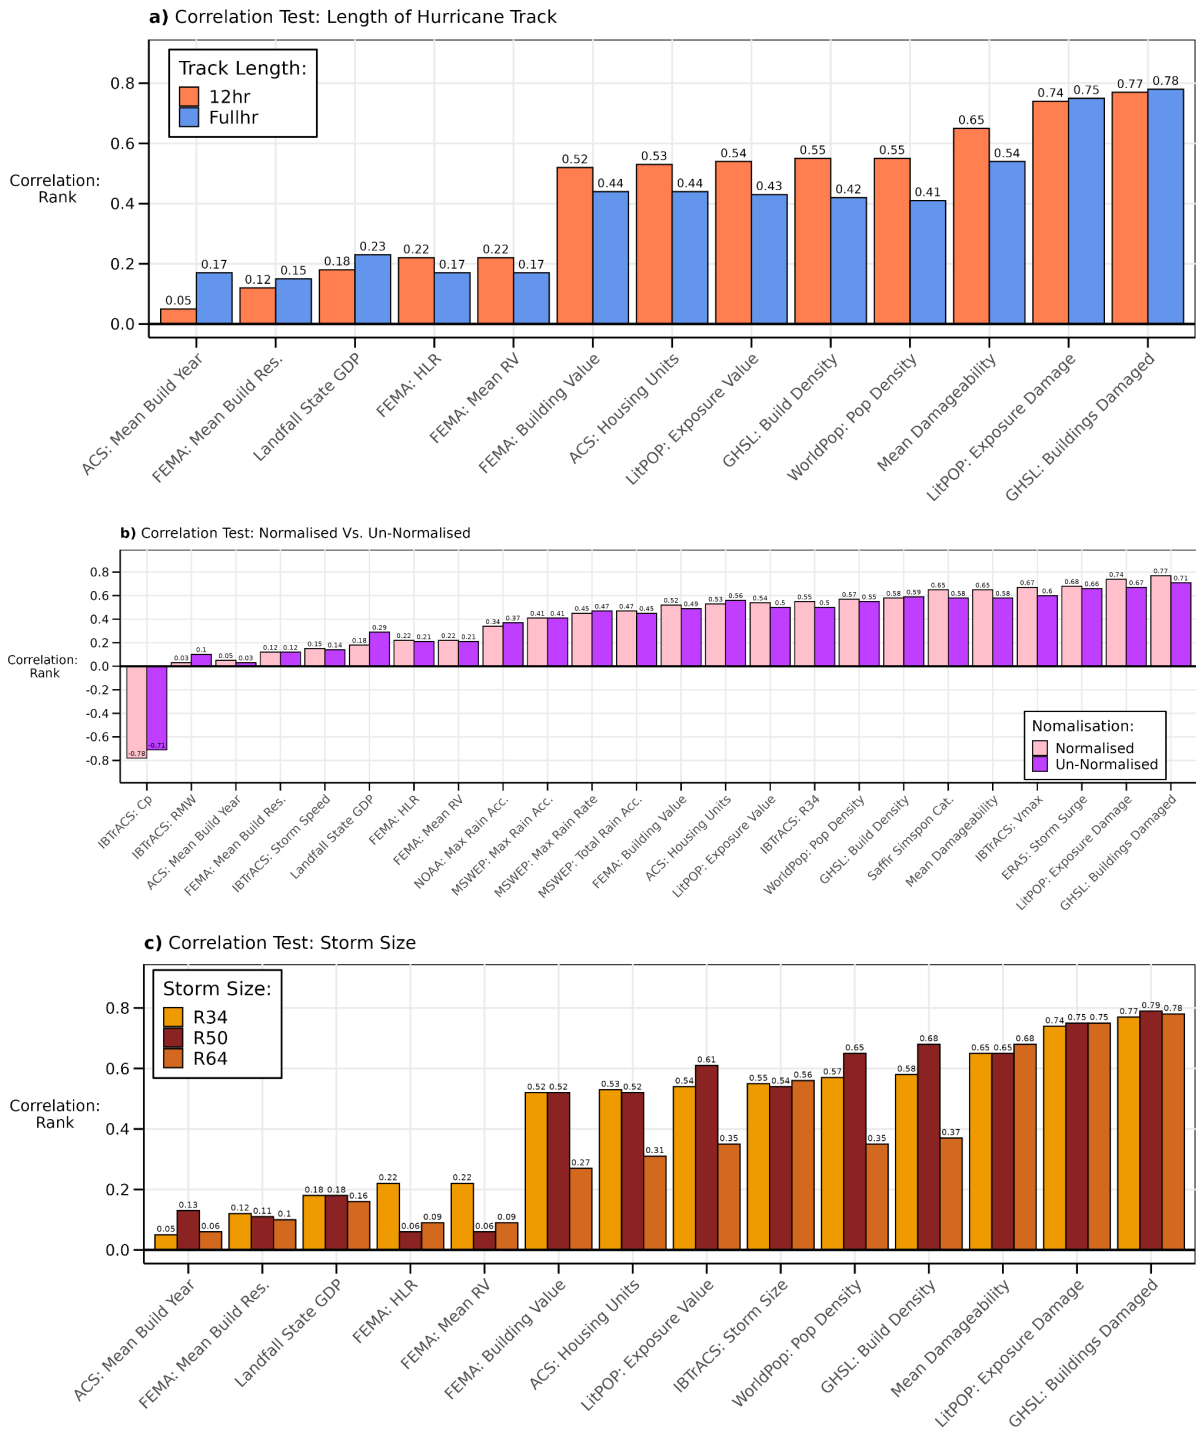

**Figure S5.** Uncertainty in Spearman coefficient for correlation with economic loss estimates when (a) different track lengths are used to calculate exposure and vulnerability footprints (using 12 hours post-landfall versus the full track), (b) using un-normalised and normalised economic loss, and (c) using R34, R50 and R64 to define the hurricane exposure and vulnerability impact footprint radii. If un-normalised, past building density, population density and housing unit footprint data are used; if normalised, present-day building density, population density and housing unit footprint data are used for all historical storms.

| Saffir–Simpson category | Percentage of historical U.S. landfalling hurricanes | Saffir–Simson scale $v_{max}$ threshold (kts) | $c_p$ threshold (hPa) | Loss (U.S.\$ bn) |
|-------------------------|------------------------------------------------------|-----------------------------------------------|-----------------------|------------------|
| <b>Cat 1</b>            | 55.4%                                                | <64                                           | <962.0                | <5.3             |
| <b>Cat 2</b>            | 25.6%                                                | 64 - 83                                       | 962.0 - 946.4         | 5.3 - 24.9       |
| <b>Cat 3</b>            | 9.2%                                                 | 83 - 96                                       | 946.4 - 937.8         | 24.9 - 48.2      |
| <b>Cat 4</b>            | 9.2%                                                 | 96 - 114                                      | 937.8 - 923.3         | 48.2 - 150.7     |
| <b>Cat 5</b>            | 1.5%                                                 | 114 - 136                                     | 923.3+                | 150.7+           |

**Table S2.** Historical U.S. landfalling hurricanes (1979–2023) per Saffir–Simpson category and the thresholds in landfalling  $c_p$  and loss rank required to reclassify historical hurricanes in our HLPS scale, maintaining the same proportions of events per category.
